# Supplementary material for: TRPM7 via calcineurin/NFAT pathway mediates metastasis and chemotherapeutic resistance in head and neck squamous cell carcinoma
Source: publisher site journal article supplement (doi:10.18632/aging.204154), 2022-06-29
Supplement: Supplementary file [file aging-v14i12-204154-supplementary-material-SD1.pdf]

## SUPPLEMENTARY FIGURES

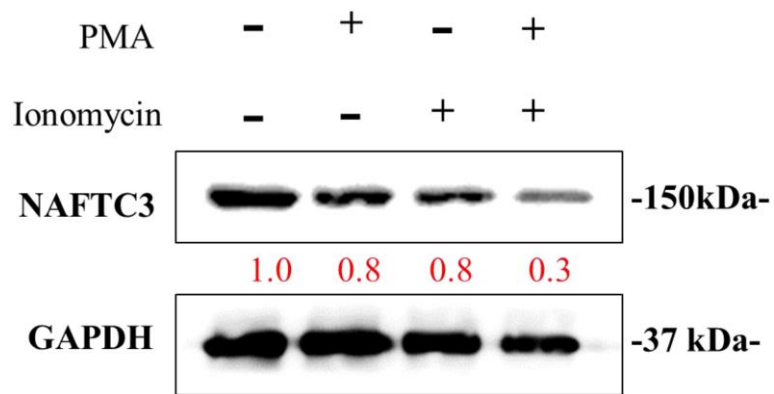

**Supplementary Figure 1. Immunoblotting analyses of NFATc3 protein expression levels in SAS cells.** Cells stimulated with PMA (20 ng/ml), ionomycin (1 mg/ml) for 60 min.

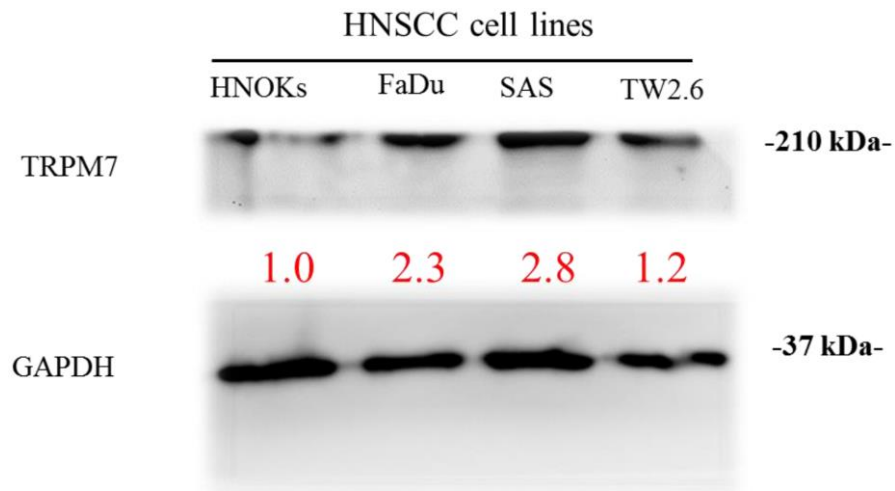

**Supplementary Figure 2. Full-size blots of Figure 2A.**

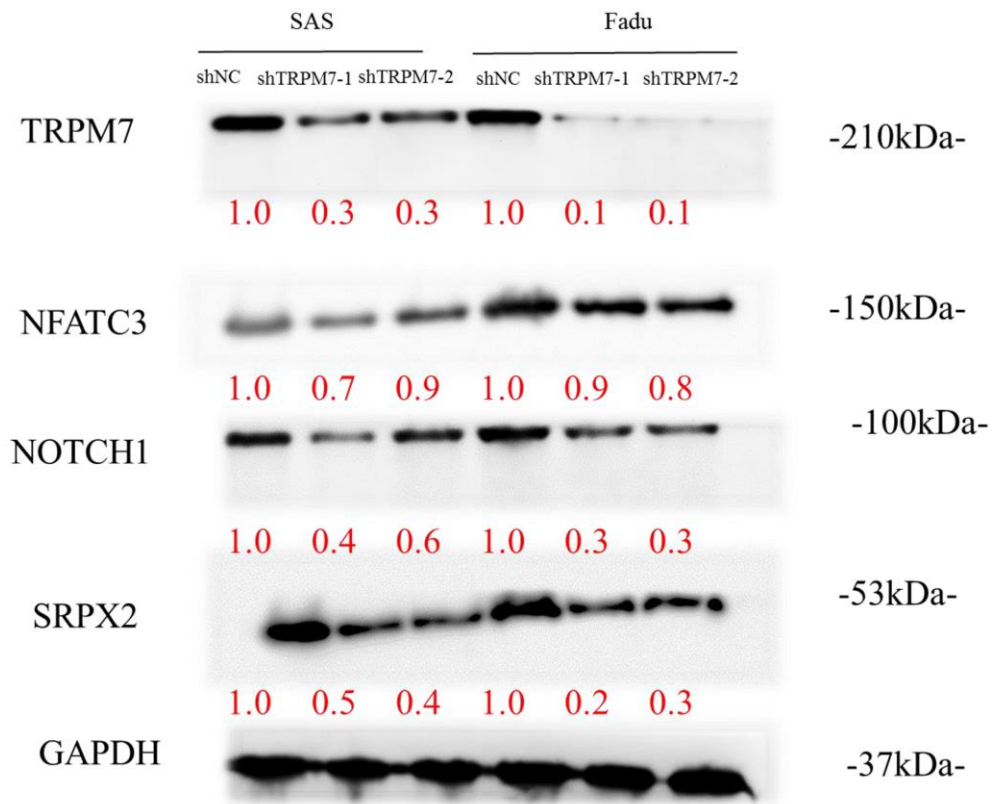

Supplementary Figure 3. Full-size blots of Figure 2B.

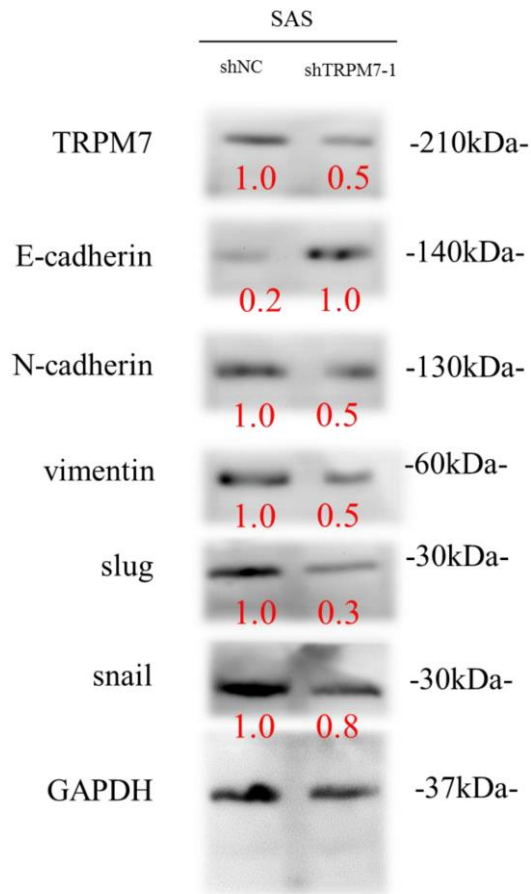

Supplementary Figure 4. Full-size blots of Figure 2F.

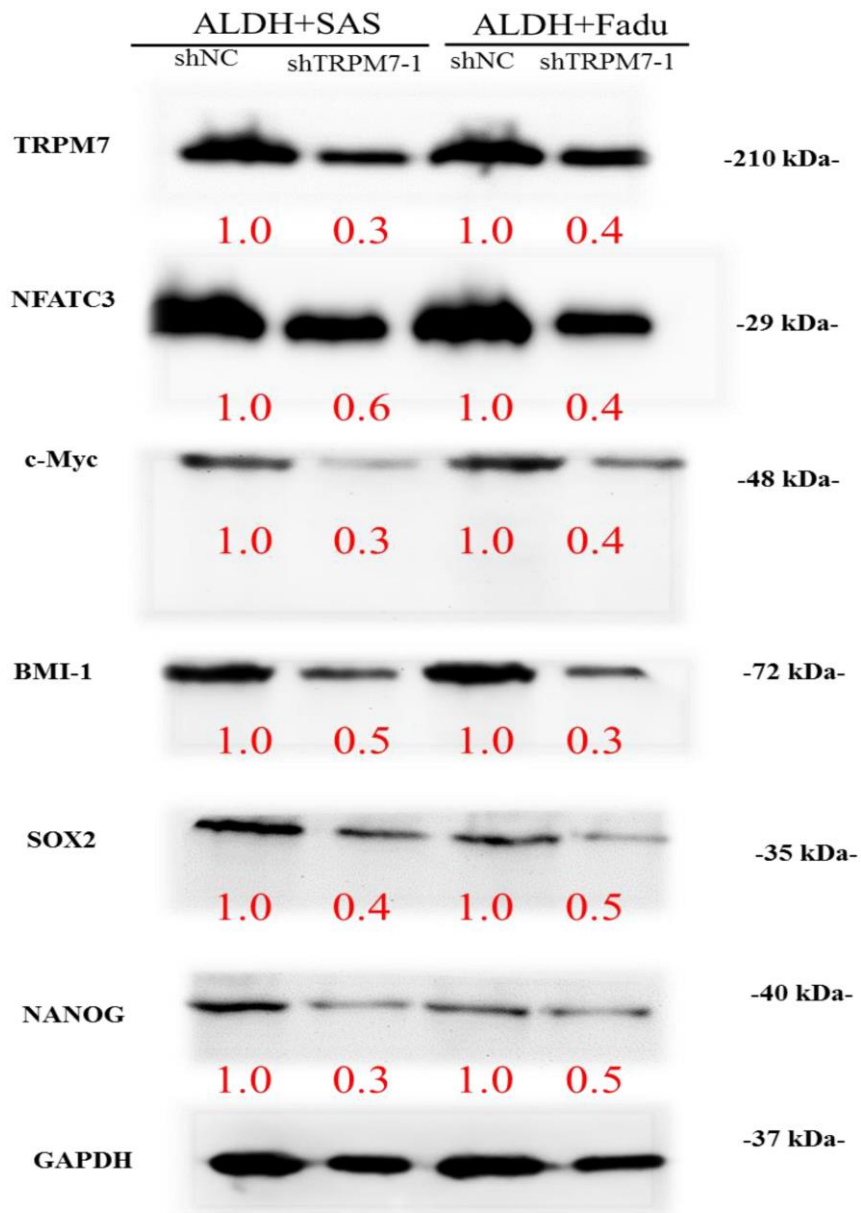

Supplementary Figure 5. Full-size blots of Figure 3D.

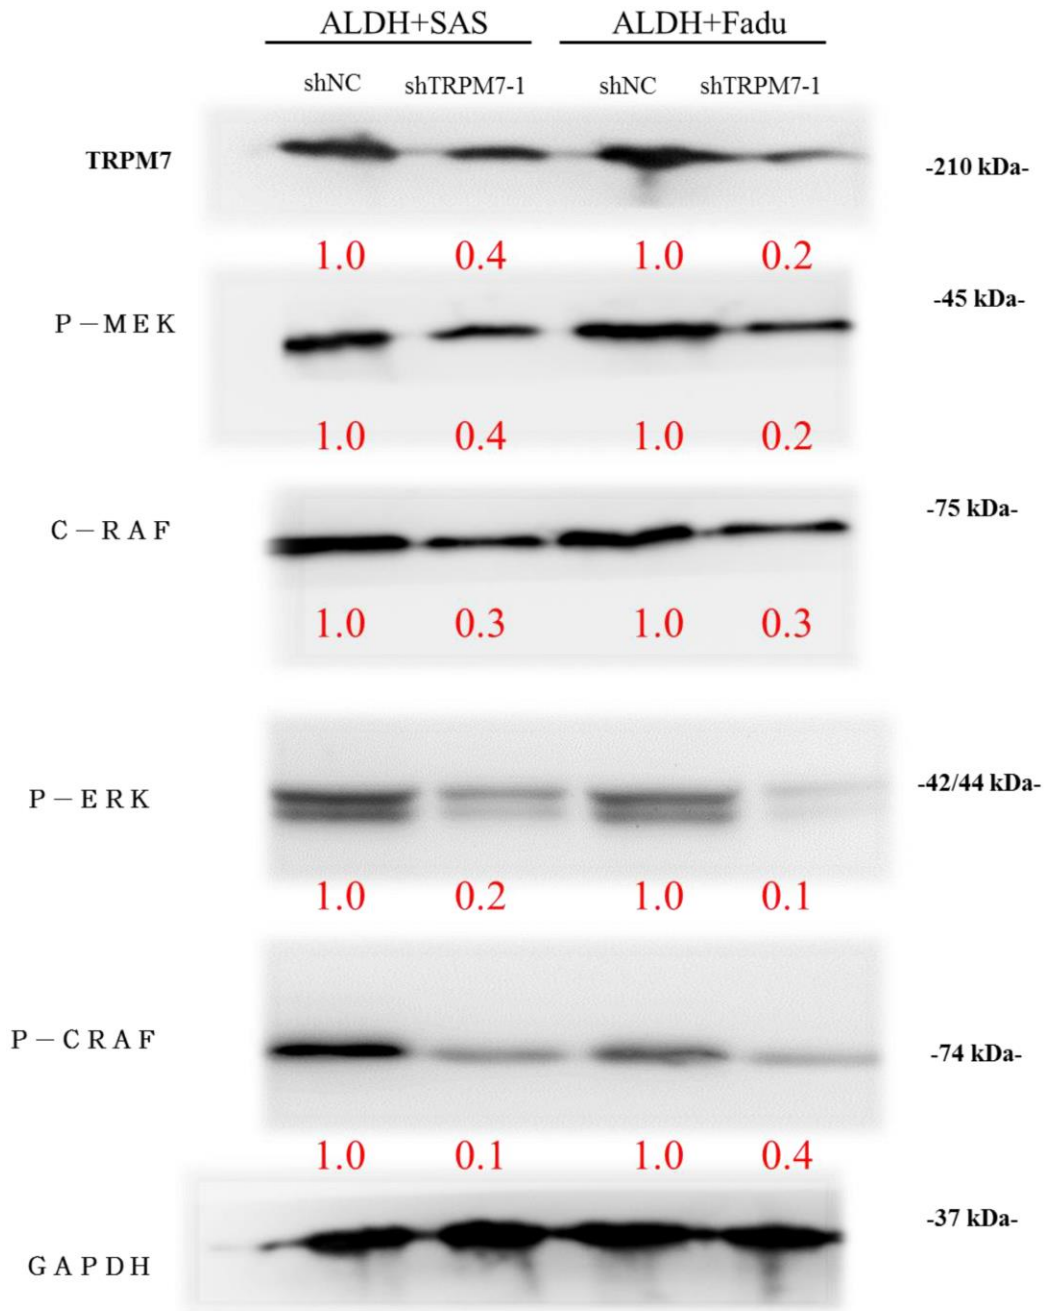

Supplementary Figure 6. Full-size blots of Figure 4D.
